# Supplementary material for: Assessing the Moderating Effect of the End User in Consumer Behavior: The Acceptance of Technological Implants to Increase Innate Human Capacities
Source: PubMed Central journal article supplement (PMC4761839; doi:10.3389/fpsyg.2016.00132), 2016-02-22
Supplement: DataSheet1.pdf [file DataSheet1.pdf]

## Appendix

Table A1 shows the results of the assessment of the measurement model, namely, the standardized loadings and t-values of all the variables included in the final CAN model.

**TABLE A1 Standardized loadings and t-values of T3ICs “for me” and T3ICs “for my child.”**

|                              | T3ICs “for me” |         | T3ICs “for my child” |         |
|------------------------------|----------------|---------|----------------------|---------|
|                              | Loading        | t-value | Loading              | t-value |
| <i>Intention to use</i>      |                |         |                      |         |
| Intention to use             | 0.987          | 488.144 | 0.989                | 489.793 |
| Predicted use                | 0.987          | 454.374 | 0.990                | 517.188 |
| <i>Perceived usefulness</i>  |                |         |                      |         |
| Performance                  | 0.961          | 222.588 | 0.961                | 233.979 |
| Productivity                 | 0.964          | 180.862 | 0.964                | 177.831 |
| Effectiveness                | 0.961          | 172.136 | 0.961                | 173.109 |
| Usefulness                   | 0.949          | 145.696 | 0.949                | 132.411 |
| <i>Perceived ease of use</i> |                |         |                      |         |
| Easy to learn                | 0.953          | 143.988 | 0.952                | 136.070 |
| Easy to use                  | 0.940          | 100.977 | 0.942                | 112.618 |
| Easy to become skillful      | 0.971          | 177.777 | 0.971                | 176.604 |
| Easy to do                   | 0.971          | 240.338 | 0.971                | 231.515 |
| <i>Subjective norm</i>       |                |         |                      |         |
| Influence me                 | 0.975          | 204.883 | 0.988                | 472.822 |
| Important to me              | 0.976          | 248.345 | 0.988                | 467.299 |
| <i>Positive emotions</i>     |                |         |                      |         |
| Interested                   | 0.813          | 49.268  | 0.803                | 47.387  |
| Proud                        | 0.859          | 67.068  | 0.865                | 54.907  |
| Inspired                     | 0.861          | 58.415  | 0.828                | 43.154  |
| Strong                       | 0.864          | 57.748  | 0.875                | 59.352  |
| Active                       | 0.850          | 54.432  | 0.862                | 54.538  |
| Excited                      | 0.739          | 25.190  | 0.774                | 29.287  |
| Determined                   | 0.871          | 65.755  | 0.866                | 59.264  |
| Enthusiastic                 | 0.932          | 157.869 | 0.911                | 79.512  |
| <i>Negative emotions</i>     |                |         |                      |         |
| Irritable                    | 0.868          | 39.641  | 0.888                | 38.565  |
| Ashamed                      | 0.690          | 12.448  | 0.744                | 13.384  |
| Upset                        | 0.888          | 53.377  | 0.896                | 51.561  |
| Guilty                       | 0.688          | 12.431  | 0.791                | 17.456  |
| Hostile                      | 0.873          | 52.063  | 0.881                | 40.377  |
| <i>Anxiety</i>               |                |         |                      |         |
| Nervous                      | 0.728          | 6.980   | 0.771                | 3.719   |
| Jittery                      | 0.780          | 8.338   | 0.745                | 3.556   |
| Distressed                   | 0.848          | 18.615  | 0.917                | 4.907   |
| Afraid                       | 0.899          | 17.799  | 0.894                | 5.225   |
| Scared                       | 0.902          | 18.784  | 0.928                | 5.424   |
